# Supplementary material
Source: Copernicus journal article supplement (doi:10.5194/essd-2025-551)
Supplement: Supplementary file [file essd-2025-551-AC4-supplement.pdf]

**General comment:** This is a valuable and difficult-to-reproduce mercury dataset across multiple environmental compartments of the Third Pole. The breadth of the dataset is impressive and potentially well suited to ESSD. However, the manuscript still reads partly as a synthesis of previous Hg studies rather than as a data-description paper. I suggest that the authors more clearly refocus the manuscript on dataset structure, reuse, file-level metadata, and practical guidance for users.

**Response:** We sincerely appreciate the reviewer's rigorous, detailed, and constructive comments, which have greatly helped us standardize the dataset presentation, optimize manuscript structure, and improve the reusability and traceability of our Third Pole Hg dataset. All revisions have been marked in red in the revised manuscript. Below is our point-by-point response to each comment.

**Lines 96–104 and Section 4:** The stated aim is to provide an overview of previous studies and present an organized Hg dataset. This is appropriate, but Section 4 often emphasizes interpretation of previous findings rather than documenting the dataset itself. To improve ESSD suitability, each APCC subset could follow a more consistent data-description format: repository file, matrix, variables, sample number, temporal coverage, spatial coverage, method summary, descriptive statistics, limitations, and recommended use.

**Response:** Thank you for your constructive comment. We have revised Section 4 to follow the ESSD data-description format as closely as possible, focusing on objective description of the dataset rather than interpretation of previous findings. A minimal amount of interpretive text has been retained only where necessary to clarify the meaning and appropriate use of the data for future users. More detailed objective descriptions have also been added directly to the revised dataset files (e.g., README files and metadata sheets). Where feasible, we have incorporated your suggestions into the revised manuscript.

**Lines 40–44 and 565–577 / Data availability:** The manuscript states that the data are archived in standardized Excel format and provides a DOI, but the relationship between the manuscript, repository files, and data products remains unclear. Please add a concise repository overview table listing each APCC subset, file name, environmental matrix, number of records/samples, temporal coverage, spatial coverage, main variables, and associated publication. This would complement the more detailed file-format and accessibility issues noted by other reviewers.

**Response:** We thank the reviewer for pointing out the unclear relationship between the manuscript, the repository files, and the data products. To address this, we have added a new table (Table 4) to the revision. This table lists each APCC subset along with the corresponding repository file name, environmental matrix, number of records/samples, temporal coverage, spatial coverage, main variables, and the associated original publication(s). This makes it explicit which file corresponds to which subset and where to find the data described in the manuscript.

**Lines 261–267 and 319–322 / Derived variables:** HgP is calculated as HgT–HgD. Please clearly mark derived variables in the repository files and document the calculation method. Similar documentation is needed for deposition fluxes, accumulation rates, chronology-derived variables, spatial gradients, interpolated fields, etc.

Response: We thank the reviewer for the detailed suggestion. We have now marked all derived variables in the repository files and provided a description of the calculation method for each derived variable in the README file (please see the updated link for dataset information). For each derived variable, we provide the exact calculation formula, the input variables used, and any unit conversion factors.

**Lines 390–416 / Precipitation Hg:** Please state explicitly whether the repository contains event-level precipitation data, seasonal averages, annual fluxes, or only summary statistics. If fluxes are included, please document the equations and precipitation inputs used to calculate them.

Response: The repository contains event-level precipitation Hg concentrations, seasonal averages, and annual deposition fluxes, all of which have been included in the updated dataset I-3. The README file also provides a detailed description of the flux calculation, including the equations and precipitation inputs used.

**Lines 500–518 / Ice core and lake sediment cores:** Please provide more information on chronology and uncertainty. For sediment- and ice-core data, the repository should include or link to age-depth models, dating methods, dating uncertainties, accumulation-rate calculations, and whether Hg fluxes are measured or derived.

Response: Thank you for your comment. The details concerning age-depth models, dating methods, dating uncertainties, accumulation-rate calculations, and whether Hg fluxes are measured or derived have been thoroughly described in our previous publication (Kang et al., 2016, Environ. Sci. Technol., doi:10.1021/acs.est.5b04172) and its supporting information. Due to space constraints, we do not repeat these technical details in the present ESSD manuscript or the repository files. Instead, we have clearly indicated the relevant source in lines 528-533 in the revised manuscript and refer readers to Kang et al. (2016) for full information.

**Lines 520–536 / Stable Hg isotopes:** Other reviewers have raised important scientific questions about isotope interpretation and missing isotope matrices. In addition, from a data-reuse perspective, the manuscript should explicitly document what is included in the isotope files:  $\delta^{202}\text{Hg}$ ,  $\Delta^{199}\text{Hg}$ ,  $\Delta^{200}\text{Hg}$ ,  $\Delta^{201}\text{Hg}$ , analytical uncertainty, replicate measurements, sample matrix, sampling date, site, associated Hg concentration, notation, and reference standard.

Response: We thank the reviewer for highlighting the importance of clearly documenting stable Hg isotope data for reuse. In response, we have fully revised the APCC I-9 isotope data file to explicitly include all the elements requested. Specifically, the isotope file now contains the following columns:  $\delta^{202}\text{Hg}$  (‰),  $\Delta^{199}\text{Hg}$  (‰),  $\Delta^{200}\text{Hg}$  (‰),  $\Delta^{201}\text{Hg}$  (‰), 2SD (‰) and reference material. Where certain isotope ratios or metadata were not measured or not applicable, we use the standardized codes NA.

**Lines 537–564 / Dataset limitations and applications:** Building on comments from other reviewers, this section would be more useful if it provided practical guidance for users. Please clarify which subsets are suitable for regional spatial comparisons, seasonal analysis, model evaluation, deposition-flux estimation, source attribution, or climate-change impact studies. Also

identify uses that are not recommended because of sparse coverage, non-synchronous sampling, method differences, or limited temporal resolution.

Response: Thank you for the suggestion. In the revision, we have now explicitly listed for each data subset both the recommended applications (regional spatial comparison, seasonal analysis, model evaluation, deposition-flux estimation, source attribution, and climate-change impact studies) and the not-recommended uses, along with the reasons (sparse coverage, non-synchronous sampling, method differences, or limited temporal resolution). This practical guidance for data application has been added in Section 5. This issue was also raised and highlighted by the third reviewer.

**Lines 565–577 / Data availability:** Please add repository title, dataset version, release date or access date, license, whether future updates are expected, and whether all data needed to reproduce the manuscript figures are included.

Response: We have revised the Data Availability section following ESSD’s mandatory metadata requirements. Please refer to lines 585-592 in the revision.

“The APCC dataset (v1.0) is archived at the Cold and Arid Regions Science Data Center at Lanzhou, released on 03 December 2024 with the persistent DOI <https://www.doi.org/10.12072/ncdc.qzkk.db6654.2024> (Kang et al., 2024). This dataset is available under the CC BY 4.0 International License and will be updated annually with newly acquired Hg concentration and deposition observations over the Third Pole. All raw field measurements, quality-controlled intermediate data, and summary statistics necessary to reproduce all manuscript figures and tables are fully deposited in the repository. No proprietary or restricted datasets were employed in this work, ensuring full reproducibility of all results.”

**General comment on figure/data traceability:** Please improve traceability between the figures and archived data by stating which repository files and variables were used to generate each figure. If figures use processed or unpublished intermediate data, those data should also be archived or clearly documented.

Response: We have fully optimized the traceability of figures and archived data in the revision.

**Comment on APCC dataset I-7 / ice and lake sediment cores:** The core dataset should include depth information for both ice-core and lake-sediment-core records. At present, the table includes age-related fields such as “Ice age (year)” and “<sup>210</sup>Pb-inferred Year,” plus Hg concentration and flux columns, but it does not provide core depth or depth intervals. Please add, at minimum, core depth top, core depth bottom, interval thickness/resolution, and units for each record. For sediment cores, depth intervals are necessary to evaluate the age-depth model, accumulation-rate calculations, and Hg concentration profiles. For the ice core, depth intervals are needed to link Hg concentrations and deposition fluxes to the chronology and sampling resolution.

Response: We fully agree that depth information is essential. We have now added the following columns to both ice-core and sediment-core records in the revised APCC I-7 dataset: Depth top (cm), Depth bottom (cm) and Interval thickness (cm) for sediment cores; Total length (cm), Min depth interval (cm) and Max depth interval (cm) for ice cor.

For each sample or depth interval, the top and bottom depths (in cm) are provided, along with the thickness and sampling resolution. The units (cm) are clearly indicated in the column headers and in the accompanying data dictionary.

|    | A        | B         | C        | D         | E                 | F          | G           | H         | I         | J            | K    | L        | M                                                     | N | O | P | Q |
|----|----------|-----------|----------|-----------|-------------------|------------|-------------|-----------|-----------|--------------|------|----------|-------------------------------------------------------|---|---|---|---|
| 1  | latitude | longitude | type     | elevation | abbreviaticregion | Hg deposit | Total lengt | Min depth | Max depth | Ice age (ye) | Hg   | Concer   | Reference                                             |   |   |   |   |
| 2  | 33.58    | 91.18     | ice core | 6621      | GQ                | Guoqu Gla  | 0.945379    | 147       | 5         | 10           | 1982 | 3.6145   | Kang et al., 2016, Environmental Science & Technology |   |   |   |   |
| 3  | 33.58    | 91.18     | ice core | 6621      | GQ                | Guoqu Gla  | 1.190197    | 147       | 5         | 10           | 1981 | 2.709333 | Kang et al., 2016, Environmental Science & Technology |   |   |   |   |
| 4  | 33.58    | 91.18     | ice core | 6621      | GQ                | Guoqu Gla  | 0.492553    | 147       | 5         | 10           | 1980 | 1.9174   | Kang et al., 2016, Environmental Science & Technology |   |   |   |   |
| 5  | 33.58    | 91.18     | ice core | 6621      | GQ                | Guoqu Gla  | 0.555984    | 147       | 5         | 10           | 1979 | 2.675    | Kang et al., 2016, Environmental Science & Technology |   |   |   |   |
| 6  | 33.58    | 91.18     | ice core | 6621      | GQ                | Guoqu Gla  | 0.984452    | 147       | 5         | 10           | 1978 | 2.837917 | Kang et al., 2016, Environmental Science & Technology |   |   |   |   |
| 7  | 33.58    | 91.18     | ice core | 6621      | GQ                | Guoqu Gla  | 1.520503    | 147       | 5         | 10           | 1977 | 4.2515   | Kang et al., 2016, Environmental Science & Technology |   |   |   |   |
| 8  | 33.58    | 91.18     | ice core | 6621      | GQ                | Guoqu Gla  | 2.54893     | 147       | 5         | 10           | 1976 | 9.75112  | Kang et al., 2016, Environmental Science & Technology |   |   |   |   |
| 9  | 33.58    | 91.18     | ice core | 6621      | GQ                | Guoqu Gla  | 1.052832    | 147       | 5         | 10           | 1975 | 2.645275 | Kang et al., 2016, Environmental Science & Technology |   |   |   |   |
| 10 | 33.58    | 91.18     | ice core | 6621      | GQ                | Guoqu Gla  | 0.830345    | 147       | 5         | 10           | 1974 | 2.400786 | Kang et al., 2016, Environmental Science & Technology |   |   |   |   |
| 11 | 33.58    | 91.18     | ice core | 6621      | GQ                | Guoqu Gla  | 0.812014    | 147       | 5         | 10           | 1973 | 2.8547   | Kang et al., 2016, Environmental Science & Technology |   |   |   |   |
| 12 | 33.58    | 91.18     | ice core | 6621      | GQ                | Guoqu Gla  | 0.293689    | 147       | 5         | 10           | 1972 | 1.177725 | Kang et al., 2016, Environmental Science & Technology |   |   |   |   |
| 13 | 33.58    | 91.18     | ice core | 6621      | GQ                | Guoqu Gla  | 0.3175      | 147       | 5         | 10           | 1971 | 1.7795   | Kang et al., 2016, Environmental Science & Technology |   |   |   |   |
| 14 | 33.58    | 91.18     | ice core | 6621      | GQ                | Guoqu Gla  | 0.562113    | 147       | 5         | 10           | 1970 | 2.24765  | Kang et al., 2016, Environmental Science & Technology |   |   |   |   |
| 15 | 33.58    | 91.18     | ice core | 6621      | GQ                | Guoqu Gla  | 0.478636    | 147       | 5         | 10           | 1969 | 2.139917 | Kang et al., 2016, Environmental Science & Technology |   |   |   |   |
| 16 | 33.58    | 91.18     | ice core | 6621      | GQ                | Guoqu Gla  | 0.576927    | 147       | 5         | 10           | 1968 | 2.220241 | Kang et al., 2016, Environmental Science & Technology |   |   |   |   |
| 17 | 33.58    | 91.18     | ice core | 6621      | GQ                | Guoqu Gla  | 0.771084    | 147       | 5         | 10           | 1967 | 4.7725   | Kang et al., 2016, Environmental Science & Technology |   |   |   |   |
| 18 | 33.58    | 91.18     | ice core | 6621      | GQ                | Guoqu Gla  | 0.702229    | 147       | 5         | 10           | 1966 | 1.698888 | Kang et al., 2016, Environmental Science & Technology |   |   |   |   |
| 19 | 33.58    | 91.18     | ice core | 6621      | GQ                | Guoqu Gla  | 0.58503     | 147       | 5         | 10           | 1965 | 2.31875  | Kang et al., 2016, Environmental Science & Technology |   |   |   |   |
| 20 | 33.58    | 91.18     | ice core | 6621      | GQ                | Guoqu Gla  | 0.295968    | 147       | 5         | 10           | 1964 | 1.365    | Kang et al., 2016, Environmental Science & Technology |   |   |   |   |
| 21 | 33.58    | 91.18     | ice core | 6621      | GQ                | Guoqu Gla  | 0.438198    | 147       | 5         | 10           | 1963 | 1.31018  | Kang et al., 2016, Environmental Science & Technology |   |   |   |   |
| 22 | 33.58    | 91.18     | ice core | 6621      | GQ                | Guoqu Gla  | 1.383821    | 147       | 5         | 10           | 1962 | 3.224083 | Kang et al., 2016, Environmental Science & Technology |   |   |   |   |
| 23 | 33.58    | 91.18     | ice core | 6621      | GQ                | Guoqu Gla  | 1.73575     | 147       | 5         | 10           | 1961 | 4.5528   | Kang et al., 2016, Environmental Science & Technology |   |   |   |   |
| 24 | 33.58    | 91.18     | ice core | 6621      | GQ                | Guoqu Gla  | 1.183386    | 147       | 5         | 10           | 1960 | 3.2397   | Kang et al., 2016, Environmental Science & Technology |   |   |   |   |
| 25 | 33.58    | 91.18     | ice core | 6621      | GQ                | Guoqu Gla  | 1.049943    | 147       | 5         | 10           | 1959 | 2.5089   | Kang et al., 2016, Environmental Science & Technology |   |   |   |   |
| 26 | 33.58    | 91.18     | ice core | 6621      | GQ                | Guoqu Gla  | 0.839581    | 147       | 5         | 10           | 1958 | 1.951783 | Kang et al., 2016, Environmental Science & Technology |   |   |   |   |
| 27 | 33.58    | 91.18     | ice core | 6621      | GQ                | Guoqu Gla  | 1.042407    | 147       | 5         | 10           | 1957 | 2.6775   | Kang et al., 2016, Environmental Science & Technology |   |   |   |   |

Figure 1. APCC dataset I-7 Ice core Hg data

|    | A        | B         | C          | D         | E                 | F            | G        | H        | I        | J         | K          | L            | M                                                     | N | O | P | Q |
|----|----------|-----------|------------|-----------|-------------------|--------------|----------|----------|----------|-----------|------------|--------------|-------------------------------------------------------|---|---|---|---|
| 1  | latitude | longitude | type       | elevation | abbreviaticregion | 210Pb-inf(Hg | deposit  | Hg       | Concer   | Depth top | Depth bott | Interval thi | Reference                                             |   |   |   |   |
| 2  | 28.095   | 85.65     | lake sedim | 4390      | PKR               | Gosainkun    | 2010     | 24.63709 | 424.808  | 18.5      | 88         | 0.5          | Kang et al., 2016, Environmental Science & Technology |   |   |   |   |
| 3  | 28.095   | 85.65     | lake sedim | 4390      | PKR               | Gosainkun    | 2001.648 | 28.03308 | 449.6214 | 18.5      | 88         | 0.5          | Kang et al., 2016, Environmental Science & Technology |   |   |   |   |
| 4  | 28.095   | 85.65     | lake sedim | 4390      | PKR               | Gosainkun    | 1992.751 | 29.97564 | 396.7455 | 18.5      | 88         | 0.5          | Kang et al., 2016, Environmental Science & Technology |   |   |   |   |
| 5  | 28.095   | 85.65     | lake sedim | 4390      | PKR               | Gosainkun    | 1984.526 | 23.5532  | 356.4764 | 18.5      | 88         | 0.5          | Kang et al., 2016, Environmental Science & Technology |   |   |   |   |
| 6  | 28.095   | 85.65     | lake sedim | 4390      | PKR               | Gosainkun    | 1976.615 | 28.59993 | 359.3154 | 18.5      | 88         | 0.5          | Kang et al., 2016, Environmental Science & Technology |   |   |   |   |
| 7  | 28.095   | 85.65     | lake sedim | 4390      | PKR               | Gosainkun    | 1969.423 | 43.98372 | 647.691  | 18.5      | 88         | 0.5          | Kang et al., 2016, Environmental Science & Technology |   |   |   |   |
| 8  | 28.095   | 85.65     | lake sedim | 4390      | PKR               | Gosainkun    | 1961.153 | 34.00796 | 331.1066 | 18.5      | 88         | 0.5          | Kang et al., 2016, Environmental Science & Technology |   |   |   |   |
| 9  | 28.095   | 85.65     | lake sedim | 4390      | PKR               | Gosainkun    | 1955.025 | 31.18257 | 247.3885 | 18.5      | 88         | 0.5          | Kang et al., 2016, Environmental Science & Technology |   |   |   |   |
| 10 | 28.095   | 85.65     | lake sedim | 4390      | PKR               | Gosainkun    | 1947.715 | 48.40608 | 246.8268 | 18.5      | 88         | 0.5          | Kang et al., 2016, Environmental Science & Technology |   |   |   |   |
| 11 | 28.095   | 85.65     | lake sedim | 4390      | PKR               | Gosainkun    | 1943.398 | 52.09905 | 433.9804 | 18.5      | 88         | 0.5          | Kang et al., 2016, Environmental Science & Technology |   |   |   |   |
| 12 | 28.095   | 85.65     | lake sedim | 4390      | PKR               | Gosainkun    | 1937.175 | 53.81175 | 493.5239 | 18.5      | 88         | 0.5          | Kang et al., 2016, Environmental Science & Technology |   |   |   |   |
| 13 | 28.095   | 85.65     | lake sedim | 4390      | PKR               | Gosainkun    | 1931.125 | 68.54952 | 578.1633 | 18.5      | 88         | 0.5          | Kang et al., 2016, Environmental Science & Technology |   |   |   |   |
| 14 | 28.095   | 85.65     | lake sedim | 4390      | PKR               | Gosainkun    | 1925.178 | 51.8009  | 326.5676 | 18.5      | 88         | 0.5          | Kang et al., 2016, Environmental Science & Technology |   |   |   |   |
| 15 | 28.095   | 85.65     | lake sedim | 4390      | PKR               | Gosainkun    | 1920.091 | 66.77731 | 301.3996 | 18.5      | 88         | 0.5          | Kang et al., 2016, Environmental Science & Technology |   |   |   |   |
| 16 | 28.095   | 85.65     | lake sedim | 4390      | PKR               | Gosainkun    | 1915.665 | 30.72736 | 294.7489 | 18.5      | 88         | 0.5          | Kang et al., 2016, Environmental Science & Technology |   |   |   |   |
| 17 | 28.095   | 85.65     | lake sedim | 4390      | PKR               | Gosainkun    | 1908.512 | 20.50628 | 235.8578 | 18.5      | 88         | 0.5          | Kang et al., 2016, Environmental Science & Technology |   |   |   |   |
| 18 | 28.095   | 85.65     | lake sedim | 4390      | PKR               | Gosainkun    | 1894.885 | 18.43443 | 207.7454 | 18.5      | 88         | 0.5          | Kang et al., 2016, Environmental Science & Technology |   |   |   |   |
| 19 | 28.095   | 85.65     | lake sedim | 4390      | PKR               | Gosainkun    | 1883.923 | 13.68265 | 202.3053 | 18.5      | 88         | 0.5          | Kang et al., 2016, Environmental Science & Technology |   |   |   |   |
| 20 | 28.095   | 85.65     | lake sedim | 4390      | PKR               | Gosainkun    | 1874.581 | 9.666597 | 110.3489 | 18.5      | 88         | 0.5          | Kang et al., 2016, Environmental Science & Technology |   |   |   |   |
| 21 | 28.095   | 85.65     | lake sedim | 4390      | PKR               | Gosainkun    | 1854.181 | 5.199427 | 144.0385 | 18.5      | 88         | 0.5          | Kang et al., 2016, Environmental Science & Technology |   |   |   |   |
| 22 | 28.151   | 80.255    | lake sedim | 793       | PHE               | Phewa        | 2007.674 | 130.4546 | 116.9937 | 18.5      | 88         | 0.5          | Kang et al., 2016, Environmental Science & Technology |   |   |   |   |
| 23 | 28.151   | 80.255    | lake sedim | 793       | PHE               | Phewa        | 2006.347 | 121.2309 | 148.7889 | 18.5      | 88         | 0.5          | Kang et al., 2016, Environmental Science & Technology |   |   |   |   |
| 24 | 28.151   | 80.255    | lake sedim | 793       | PHE               | Phewa        | 2005.021 | 65.92546 | 103.2888 | 18.5      | 88         | 0.5          | Kang et al., 2016, Environmental Science & Technology |   |   |   |   |
| 25 | 28.151   | 80.255    | lake sedim | 793       | PHE               | Phewa        | 2003.695 | 67.23792 | 132.0285 | 18.5      | 88         | 0.5          | Kang et al., 2016, Environmental Science & Technology |   |   |   |   |
| 26 | 28.151   | 80.255    | lake sedim | 793       | PHE               | Phewa        | 2002.369 | 85.81672 | 176.4275 | 18.5      | 88         | 0.5          | Kang et al., 2016, Environmental Science & Technology |   |   |   |   |
| 27 | 28.151   | 80.255    | lake sedim | 793       | PHE               | Phewa        | 2001.042 | 68.68248 | 120.5788 | 18.5      | 88         | 0.5          | Kang et al., 2016, Environmental Science & Technology |   |   |   |   |

Figure 2. APCC dataset I-8 Lake sediment cores Hg data

**Comment on APCC dataset I-7 / mixed core structure:** The current core table appears to combine ice-core and lake-sediment-core variables in the same rows and columns, including “Ice age (year),” “Hg Concentration (ng L<sup>-1</sup>),” “210Pb-inferred Year,” “μg yr<sup>-1</sup> m<sup>-2</sup>,” and “ng g<sup>-1</sup>.” This structure is difficult to interpret because ice-core concentrations are reported in ng L<sup>-1</sup>, whereas sediment concentrations are reported in ng g<sup>-1</sup>. Please separate ice-core and sediment-core records into distinct tables, or add a clear “archive type” column and ensure that non-applicable fields are blank and well documented.

**Response:** We thank the reviewer for highlighting this confusion. To resolve the issue, we have split the original combined table into two separate files in the revision: The APCC Dataset I-7 contains ice core mercury records with concentrations expressed as nanograms per liter (ng L<sup>-1</sup>), whereas APCC Dataset I-8 compiles lake sediment core mercury data quantified in nanograms per gram (ng g<sup>-1</sup>). Each file contains only the variables relevant to that archive type. The type column is retained in both files for clarity, and non-applicable fields have been removed. This separation eliminates any ambiguity in units and variable interpretation.

**Comment on APCC dataset I-7 / ambiguous flux columns:** The columns “ug/m2.yr” and “ug.yr-1.m-2” appear to represent fluxes, but their meanings are unclear and the two unit formats may refer to the same quantity. Please rename these fields using standard notation, for example “Hg deposition flux ( $\mu\text{g m}^{-2} \text{ yr}^{-1}$ ),” and specify what calculation method was used to derive these values.

**Response:** We have standardized the flux field naming and unit specification, and eliminated duplicate and ambiguous fields. The two columns “ug/m2.yr” and “ug.yr-1.m-2” were redundant and have been merged into a single column named Hg deposition flux ( $\mu\text{g m}^{-2} \text{ yr}^{-1}$ ). The calculation method is now explicitly described in the README file.

**Comment on APCC dataset I-7 / missing site metadata:** Many rows in the core table appear to lack region, abbreviation, elevation, or reference information. Please ensure that every record includes core/site name, archive type, latitude, longitude, elevation or lake altitude, reference, and chronology method. Repeating metadata in every row is acceptable and makes the table easier to reuse programmatically.

**Response:** We have ensured that every row in the revised I-7 files now includes complete site-level metadata. The following columns have been added and repeated for each record: core/site name, archive type, latitude, longitude, elevation (m a.s.l.) and reference. For any information that could not be retrieved or is genuinely missing, we use the following standardized codes: NA for missing value (data expected but not available), and NAp for field which does not apply to this sample type.

**Comment on APCC dataset I-6 / summary statistics mixed with raw-style fields:** The river and lake water table mixes sampling time, concentration ranges, average  $\pm$  standard deviation values, sample counts, and water-type categories. For reuse, it would be better to split these into separate columns: mean, standard deviation, minimum, maximum, number of samples, sampling start date, sampling end date, and water type. Values such as “5.44 $\pm$ 6.16” and “0.64–32.96” should not be stored as combined text strings.

**Response:** We have completely restructured the I-6 dataset following the reviewer’s suggestion. The previously combined text strings (e.g., “5.44 $\pm$ 6.16”, “0.64–32.96”) have been split into separate numeric columns: THg mean ( $\text{ng L}^{-1}$ ), THg sd ( $\text{ng L}^{-1}$ ), THg min ( $\text{ng L}^{-1}$ ), and THg max ( $\text{ng L}^{-1}$ ). The same column structure has been applied to dissolved mercury (DHg) and particulate mercury (PHg), with their respective mean, standard deviation, minimum, and maximum values reported in separate numeric columns. Sampling time is now provided as sampling start date and sampling end date. A water type column is also included. All values are stored as pure numbers, greatly improving machine readability.



|    | A         | B         | C          | D         | E          | F        | G         | H         | I         | J                                                      | K         | L | M | N |
|----|-----------|-----------|------------|-----------|------------|----------|-----------|-----------|-----------|--------------------------------------------------------|-----------|---|---|---|
| 1  | Month     | Sample ID | Sampling c | THg conce | Wet THg fl | latitude | longitude | elevation | abbreviat | region                                                 | Reference |   |   |   |
| 2  | January   | NA        | NA         | NA        | NA         | 27.167   | 100.167   | 2650      | YL        | YL, 2012 TiHuang et al., 2022, Environmental Pollution |           |   |   |   |
| 3  | February  | NA        | NA         | NA        | NA         | 27.167   | 100.167   | 2650      | YL        | YL, 2012 TiHuang et al., 2022, Environmental Pollution |           |   |   |   |
| 4  | March     | NA        | NA         | NA        | NA         | 27.167   | 100.167   | 2650      | YL        | YL, 2012 TiHuang et al., 2022, Environmental Pollution |           |   |   |   |
| 5  | April     | NA        | NA         | 34.1025   | 0.034103   | 27.167   | 100.167   | 2650      | YL        | YL, 2012 TiHuang et al., 2022, Environmental Pollution |           |   |   |   |
| 6  | May       | NA        | NA         | 17.95467  | 0.251365   | 27.167   | 100.167   | 2650      | YL        | YL, 2012 TiHuang et al., 2022, Environmental Pollution |           |   |   |   |
| 7  | June      | NA        | NA         | 6.287056  | 0.8016     | 27.167   | 100.167   | 2650      | YL        | YL, 2012 TiHuang et al., 2022, Environmental Pollution |           |   |   |   |
| 8  | July      | NA        | NA         | 5.041736  | 0.905496   | 27.167   | 100.167   | 2650      | YL        | YL, 2012 TiHuang et al., 2022, Environmental Pollution |           |   |   |   |
| 9  | August    | NA        | NA         | 8.490462  | 1.518095   | 27.167   | 100.167   | 2650      | YL        | YL, 2012 TiHuang et al., 2022, Environmental Pollution |           |   |   |   |
| 10 | September | NA        | NA         | 4.916897  | 0.568885   | 27.167   | 100.167   | 2650      | YL        | YL, 2012 TiHuang et al., 2022, Environmental Pollution |           |   |   |   |
| 11 | October   | NA        | NA         | 17.235    | 0.591161   | 27.167   | 100.167   | 2650      | YL        | YL, 2012 TiHuang et al., 2022, Environmental Pollution |           |   |   |   |
| 12 | November  | NA        | NA         | NA        | NA         | 27.167   | 100.167   | 2650      | YL        | YL, 2012 TiHuang et al., 2022, Environmental Pollution |           |   |   |   |
| 13 | December  | NA        | NA         | NA        | NA         | 27.167   | 100.167   | 2650      | YL        | YL, 2012 TiHuang et al., 2022, Environmental Pollution |           |   |   |   |
| 14 | February  | NA        | NA         | 55.61     | 0.055629   | 39.429   | 96.556    | 4230      | LHG       | LHG, 2012 Huang et al., 2022, Environmental Pollution  |           |   |   |   |
| 15 | March     | NA        | NA         | 40.405    | 0.03146    | 39.429   | 96.556    | 4230      | LHG       | LHG, 2012 Huang et al., 2022, Environmental Pollution  |           |   |   |   |
| 16 | April     | NA        | NA         | 28.55     | 0.112955   | 39.429   | 96.556    | 4230      | LHG       | LHG, 2012 Huang et al., 2022, Environmental Pollution  |           |   |   |   |
| 17 | May       | NA        | NA         | 20.266    | 0.685943   | 39.429   | 96.556    | 4230      | LHG       | LHG, 2012 Huang et al., 2022, Environmental Pollution  |           |   |   |   |
| 18 | June      | NA        | NA         | 4.748613  | 0.322429   | 39.429   | 96.556    | 4230      | LHG       | LHG, 2012 Huang et al., 2022, Environmental Pollution  |           |   |   |   |
| 19 | July      | NA        | NA         | 5.175319  | 0.599721   | 39.429   | 96.556    | 4230      | LHG       | LHG, 2012 Huang et al., 2022, Environmental Pollution  |           |   |   |   |
| 20 | August    | NA        | NA         | 5.355444  | 0.273115   | 39.429   | 96.556    | 4230      | LHG       | LHG, 2012 Huang et al., 2022, Environmental Pollution  |           |   |   |   |
| 21 | September | NA        | NA         | 6.919333  | 0.13359    | 39.429   | 96.556    | 4230      | LHG       | LHG, 2012 Huang et al., 2022, Environmental Pollution  |           |   |   |   |
| 22 | October   | NA        | NA         | 18.42     | 0.157106   | 39.429   | 96.556    | 4230      | LHG       | LHG, 2012 Huang et al., 2022, Environmental Pollution  |           |   |   |   |
| 23 | November  | NA        | NA         | 24.995    | 0.125443   | 39.429   | 96.556    | 4230      | LHG       | LHG, 2012 Huang et al., 2022, Environmental Pollution  |           |   |   |   |
| 24 | December  | NA        | NA         | 32.02333  | 0.317574   | 39.429   | 96.556    | 4230      | LHG       | LHG, 2012 Huang et al., 2022, Environmental Pollution  |           |   |   |   |
| 25 | January   | NA        | NA         | 2.9       | 0.045414   | 28.35    | 86.933    | 4276      | EV        | EV, 2011 T Huang et al., 2022, Environmental Pollution |           |   |   |   |
| 26 | February  | NA        | NA         | 4.9       | 0.070021   | 28.35    | 86.933    | 4276      | EV        | EV, 2011 T Huang et al., 2022, Environmental Pollution |           |   |   |   |
| 27 | March     | NA        | NA         | 3.5       | 0.049753   | 28.35    | 86.933    | 4276      | EV        | EV, 2011 T Huang et al., 2022, Environmental Pollution |           |   |   |   |

Figure 5. APCC dataset I-3 Precipitation Hg data.

**Comment on all APCC data tables:** Please avoid storing numerical values as combined text strings. Ranges, means, standard deviations, sample counts, and units should be separated into machine-readable columns. For example, instead of reporting a value as “5.44 ± 6.16 ng L<sup>-1</sup>” or “0.64–32.96 ng L<sup>-1</sup>,” please use separate columns such as THg\_mean\_units, THg\_sd\_units, THg\_min\_units, THg\_max\_units, and sample\_count. Here, sample\_count refers to the number of samples or observations used to calculate the summary statistics. This would greatly improve reusability and reduce ambiguity.

**Response:** We have systematically revised all APCC data tables (I-1 through I-9) to eliminate any combined text strings. Ranges, means, standard deviations, minima, maxima, and sample counts are now stored in separate, machine-readable numeric columns. Units are placed in the column names (e.g., THg concentration (ng L<sup>-1</sup>)).

**Comment on blank cells/missing values:** Blank cells should be avoided unless their meaning is clearly documented. Please distinguish among: missing but expected data, not-applicable fields, below-detection-limit values, and not-measured variables. These cases should not all appear as empty cells because they have different implications for reuse. A data dictionary could define standardized entries such as NA = missing value, not\_applicable = field does not apply to this sample type, not\_measured = variable was not analyzed, and a detection-limit flag such as below\_detection\_limit = yes/no. This would make the tables much easier to parse and interpret.

**Response:** We have removed all ambiguous blank cells and replaced them with standardized codes. The description of these standard codes for non-numeric cells has been placed in our README file. The codes are as follows:

NA: Missing but expected data

NAP: Field does not apply to the corresponding sample

All data files now use these codes consistently, and the meaning of each code is explained in the README file. Blank cells are no longer present in any of the uploaded tables. This makes the datasets much easier to parse and interpret correctly.
