# Supplementary material
Source: Copernicus journal article supplement (doi:10.5194/essd-2025-551)
Supplement: Supplementary file [file essd-2025-551-RC2-supplement.pdf]

The authors are to be commended for making this comprehensive mercury (Hg) dataset publicly available. This resource will undoubtedly foster collaborative research on climate-cryosphere-Hg feedbacks, both under current conditions and future warming scenarios. Overall, the paper is of good quality and contributes significantly to the field.

Suggestions for improvement:

1. Quality Assurance/Quality Control (QA/QC)

The paper would benefit from more detailed information on QA/QC procedures, including specifics on blanks, limits of detection, and analytical uncertainties. Clarifying these aspects would enhance the dataset's reliability and usability for future studies.

2. Temporal coverage and data summary

A table or figure summarizing the time coverage of sampling (e.g., which variables were monitored, when, and at what frequency) would greatly improve the readability and utility. For example, a visualization similar to Figure 3 in Magand et al. (2023) could effectively illustrate data coverage and the fraction of valid hourly measurements per month for TGM. This would help readers quickly assess whether the datasets are suitable for trend analysis.

3. Structural improvements

Consider merging Sections 2 and 3 for better flow and to avoid redundancy. In addition, please include information on site classifications (e.g., rural, urban, remote) in Table 1 to provide context for the sampling locations.

4. Minor correction

"Air" sampling is missing from Figure 1 and should be added for completeness.

5. Data accessibility

While reviewing the datasets, I noticed several issues that should be addressed to enhance accessibility and usability for the research community.

In the precipitation dataset (see Fig. 1), the headers are misaligned across two rows, and the first few rows do not align correctly with their respective columns. A similar misalignment issue is present in the glacier dataset (see Fig. 2).

Depth information is missing for most soil samples in APCC dataset I-5, which may limit the dataset's utility for certain analyses.

For APCC dataset I-6 (River), it would be helpful to separate the sampling time, concentration range, and average  $\pm$  standard deviation into distinct columns. The current formatting makes it challenging to efficiently reuse the data.

In APCC dataset I-7, the meaning of the following columns is unclear:  $\mu\text{g}/\text{m}^2\cdot\text{yr}$ ,  $\mu\text{g}\cdot\text{yr}^{-1}\cdot\text{m}^{-2}$ , and  $\text{ng}\cdot\text{g}^{-1}$ . Including a detailed description of all column headers in dedicated README files would clarify their purpose and improve usability.

Finally, there appears to be an issue with the column headers in APCC dataset I-8 (see Fig. 3).

Addressing these points would greatly enhance the clarity and usability of the datasets.  
 Thank you for your attention to these details!

| Month                                                       | Sample ID | Sampling date | THg concentration (ng L-1) |           |             | abbreviation | region  | Reference                                                          |
|-------------------------------------------------------------|-----------|---------------|----------------------------|-----------|-------------|--------------|---------|--------------------------------------------------------------------|
|                                                             |           | Wet THg flux  | latitude                   | longitude | elevation   |              |         |                                                                    |
| January                                                     |           |               |                            | 0         | 0           | 27.167       | 100.167 | 2650 YL, YL, 2012                                                  |
| Tibetan Plateau Huang et al., 2022, Environmental Pollution |           |               |                            |           |             |              |         |                                                                    |
| February                                                    |           |               |                            | 0         | 0           | 27.167       | 100.167 | 2650 YL, YL, 2012                                                  |
| Tibetan Plateau Huang et al., 2022, Environmental Pollution |           |               |                            |           |             |              |         |                                                                    |
| March                                                       |           |               |                            | 0         | 0           | 27.167       | 100.167 | 2650 YL, YL, 2012                                                  |
| Tibetan Plateau Huang et al., 2022, Environmental Pollution |           |               |                            |           |             |              |         |                                                                    |
| April                                                       |           |               | 34.1025                    | 100.167   | 0.0341025   | 27.167       | 100.167 | 2650 YL, YL, 2012                                                  |
| Tibetan Plateau Huang et al., 2022, Environmental Pollution |           |               |                            |           |             |              |         |                                                                    |
| May                                                         |           |               | 17.95466667                | 100.167   | 0.251365333 | 27.167       | 100.167 | 2650 YL, YL, 2012                                                  |
| Tibetan Plateau Huang et al., 2022, Environmental Pollution |           |               |                            |           |             |              |         |                                                                    |
| June                                                        |           |               | 6.287055556                | 100.167   | 0.801599583 | 27.167       | 100.167 | 2650 YL, YL, 2012                                                  |
| Tibetan Plateau Huang et al., 2022, Environmental Pollution |           |               |                            |           |             |              |         |                                                                    |
| July                                                        |           |               | 5.041736364                | 100.167   | 0.905495851 | 27.167       | 100.167 | 2650 YL, YL, 2012                                                  |
| Tibetan Plateau Huang et al., 2022, Environmental Pollution |           |               |                            |           |             |              |         |                                                                    |
| August                                                      |           |               | 8.490461538                | 100.167   | 1.518094523 | 27.167       | 100.167 | 2650 YL, YL, 2012                                                  |
| Tibetan Plateau Huang et al., 2022, Environmental Pollution |           |               |                            |           |             |              |         |                                                                    |
| September                                                   |           |               | 4.916896667                | 100.167   | 0.568884944 | 27.167       | 100.167 | 2650 YL, YL, 2012                                                  |
| Tibetan Plateau Huang et al., 2022, Environmental Pollution |           |               |                            |           |             |              |         |                                                                    |
| October                                                     |           |               | 17.235                     | 100.167   | 0.5911605   | 27.167       | 100.167 | 2650 YL, YL, 2012                                                  |
| Tibetan Plateau Huang et al., 2022, Environmental Pollution |           |               |                            |           |             |              |         |                                                                    |
| November                                                    |           |               |                            | 0         | 0           | 27.167       | 100.167 | 2650 YL, YL, 2012                                                  |
| Tibetan Plateau Huang et al., 2022, Environmental Pollution |           |               |                            |           |             |              |         |                                                                    |
| December                                                    |           |               |                            | 0         | 0           | 27.167       | 100.167 | 2650 YL, YL, 2012                                                  |
| Tibetan Plateau Huang et al., 2022, Environmental Pollution |           |               |                            |           |             |              |         |                                                                    |
| January                                                     |           |               | 26.24                      | 96.556    | 0.120918143 | 39.429       | 96.556  | 4230 LHG, LHG, 2012 Ti Huang et al., 2022, Environmental Pollution |
| February                                                    |           |               | 55.61                      | 96.556    | 0.055629176 | 39.429       | 96.556  | 4230 LHG, LHG, 2012 Ti Huang et al., 2022, Environmental Pollution |
| March                                                       |           |               | 40.405                     | 96.556    | 0.031460169 | 39.429       | 96.556  | 4230 LHG, LHG, 2012 Ti Huang et al., 2022, Environmental Pollution |
| April                                                       |           |               | 28.55                      | 96.556    | 0.112954629 | 39.429       | 96.556  | 4230 LHG, LHG, 2012 Ti Huang et al., 2022, Environmental Pollution |
| May                                                         |           |               | 20.266                     | 96.556    | 0.685942953 | 39.429       | 96.556  | 4230 LHG, LHG, 2012 Ti Huang et al., 2022, Environmental Pollution |
| June                                                        |           |               | 4.7486125                  | 96.556    | 0.322429233 | 39.429       | 96.556  | 4230 LHG, LHG, 2012 Ti Huang et al., 2022, Environmental Pollution |
| July                                                        |           |               | 5.17531875                 | 96.556    | 0.59972083  | 39.429       | 96.556  | 4230 LHG, LHG, 2012 Ti Huang et al., 2022, Environmental Pollution |

Figure 1: APCC dataset I-3 Precipitation Hg data.

|    |                        |           |           |          |                      |  |  |                                              |                                              |
|----|------------------------|-----------|-----------|----------|----------------------|--|--|----------------------------------------------|----------------------------------------------|
| 33 | Surface snow 2010-10-3 | 28.019833 | 86.962983 | 6525 EV  | East Rongbuk         |  |  |                                              |                                              |
| 34 | glacier* 2.707         | 28.019833 | 86.962983 | 6505 EV  | East Rongbuk         |  |  | Huang et al., 2012b, Atmospheric Environment |                                              |
| 35 | Surface snow           | 28.019833 | 86.962983 | 6505 EV  | East Rongbuk         |  |  |                                              |                                              |
| 36 | glacier* 2.913         | 28.019833 | 86.962983 | 6425 EV  | East Rongbuk         |  |  | Huang et al., 2012b, Atmospheric Environment |                                              |
| 37 | Surface snow           | 28.019833 | 86.962983 | 6425 EV  | East Rongbuk         |  |  |                                              |                                              |
| 38 | glacier* 2.458         | 28.019833 | 86.962983 | 6375 EV  | East Rongbuk         |  |  | Huang et al., 2012b, Atmospheric Environment |                                              |
| 39 | Surface snow           | 28.019833 | 86.962983 | 6375 EV  | East Rongbuk         |  |  |                                              |                                              |
| 40 | glacier* 1.854         | 28.019833 | 86.962983 | 6325 EV  | East Rongbuk         |  |  | Huang et al., 2012b, Atmospheric Environment |                                              |
| 41 | Surface snow           | 28.019833 | 86.962983 | 6325 EV  | East Rongbuk         |  |  |                                              |                                              |
| 42 | glacier* 2.514         | 28.019833 | 86.962983 | 6295 EV  | East Rongbuk         |  |  | Huang et al., 2012b, Atmospheric Environment |                                              |
| 43 | Surface snow           | 28.019833 | 86.962983 | 6295 EV  | East Rongbuk         |  |  |                                              |                                              |
| 44 | glacier* 1.533         | 28.019833 | 86.962983 | 6275 EV  | East Rongbuk         |  |  | Huang et al., 2012b, Atmospheric Environment |                                              |
| 45 | Surface snow           | 28.019833 | 86.962983 | 6275 EV  | East Rongbuk         |  |  |                                              |                                              |
| 46 | glacier* 1.58          | 28.019833 | 86.962983 | 6275 EV  | East Rongbuk         |  |  | Huang et al., 2012b, Atmospheric Environment |                                              |
| 47 | Surface snow 2009-4-23 | 33.953783 | 91.283083 | 5235 TGL | Ganglongjama (Guoqu) |  |  | Huang et al., 2012b, Atmospheric Environment |                                              |
| 48 | glacier* 2.612         | 33.953783 | 91.283083 | 5332 TGL | Ganglongjama (Guoqu) |  |  | Huang et al., 2012b, Atmospheric Environment |                                              |
| 49 | Surface snow           | 33.953783 | 91.283083 | 5332 TGL | Ganglongjama (Guoqu) |  |  |                                              |                                              |
| 50 | glacier* 2.484         | 33.953783 | 91.283083 | 5452 TGL | Ganglongjama (Guoqu) |  |  | Huang et al., 2012b, Atmospheric Environment |                                              |
| 51 | Surface snow           | 33.953783 | 91.283083 | 5452 TGL | Ganglongjama (Guoqu) |  |  |                                              |                                              |
| 52 | glacier* 3.038         | 33.953783 | 91.283083 | 5511 TGL | Ganglongjama (Guoqu) |  |  | Huang et al., 2012b, Atmospheric Environment |                                              |
| 53 | Surface snow           | 33.953783 | 91.283083 | 5511 TGL | Ganglongjama (Guoqu) |  |  |                                              |                                              |
| 54 | glacier* 3.798         | 33.953783 | 91.283083 | 5522 TGL | Ganglongjama (Guoqu) |  |  | Huang et al., 2012b, Atmospheric Environment |                                              |
| 55 | Surface snow           | 33.953783 | 91.283083 | 5522 TGL | Ganglongjama (Guoqu) |  |  |                                              |                                              |
| 56 | glacier* 2.746         | 33.953783 | 91.283083 | 5572 TGL | Ganglongjama (Guoqu) |  |  | Huang et al., 2012b, Atmospheric Environment |                                              |
| 57 | Surface snow           | 33.953783 | 91.283083 | 5572 TGL | Ganglongjama (Guoqu) |  |  |                                              |                                              |
| 58 | glacier* 5.682         | 33.953783 | 91.283083 | 5585 TGL | Ganglongjama (Guoqu) |  |  | Huang et al., 2012b, Atmospheric Environment |                                              |
| 59 | Surface snow           | 33.953783 | 91.283083 | 5585 TGL | Ganglongjama (Guoqu) |  |  |                                              |                                              |
| 60 | glacier* 4.105         | 33.953783 | 91.283083 | 5594 TGL | Ganglongjama (Guoqu) |  |  | Huang et al., 2012b, Atmospheric Environment |                                              |
| 61 | Surface snow           | 33.953783 | 91.283083 | 5594 TGL | Ganglongjama (Guoqu) |  |  |                                              |                                              |
| 62 | glacier* 4.531         | 33.953783 | 91.283083 | 5594 TGL | Ganglongjama (Guoqu) |  |  | Huang et al., 2012b, Atmospheric Environment |                                              |
| 63 | Surface snow           | 30.779    | 90.991    | 4730 NMC | Nam Co 3.962         |  |  |                                              | Huang et al., 2012b, Atmospheric Environment |
| 64 | Surface snow           | 30.779    | 90.991    | 4730 NMC | Nam Co 2.358         |  |  | 12/10/2010 10:00                             | Huang et al., 2012b, Atmospheric Environment |
| 65 | Surface snow           | 30.779    | 90.991    | 4730 NMC | Nam Co 5.4825        |  |  | 12/10/2010 12:00                             | Huang et al., 2012b, Atmospheric Environment |
| 66 | Surface snow           | 30.779    | 90.991    | 4730 NMC | Nam Co 4.787         |  |  | 12/10/2010 14:00                             | Huang et al., 2012b, Atmospheric Environment |
| 67 | Surface snow           | 30.779    | 90.991    | 4730 NMC | Nam Co 2.568         |  |  | 12/10/2010 17:00                             | Huang et al., 2012b, Atmospheric Environment |
| 68 | Surface snow           | 30.779    | 90.991    | 4730 NMC | Nam Co 1.6035        |  |  | 12/10/2010 19:00                             | Huang et al., 2012b, Atmospheric Environment |
|    |                        |           |           |          |                      |  |  | 12/10/2010 21:00                             | Huang et al., 2012b, Atmospheric Environment |

Figure 2: APCC dataset I-4 Glacier.

|    | A        | B                           | C                           | D            | E             | F           | G                       | H                      | I     | J     | K                                                  | L | M | N | O |
|----|----------|-----------------------------|-----------------------------|--------------|---------------|-------------|-------------------------|------------------------|-------|-------|----------------------------------------------------|---|---|---|---|
| 1  | latitude | longitude                   | elevation                   | abbreviation | region        | Measurement | Sampling date           | Total Hg concentration |       |       |                                                    |   |   |   |   |
| 2  | (ng/g)"  | $\delta^{202}\text{Hg}$ (‰) | $\delta^{199}\text{Hg}$ (‰) | Reference    |               |             |                         |                        |       |       |                                                    |   |   |   |   |
| 3  | 27.683   | 85.4                        | 1314                        | BD           | Bode, Kathm   | BD-92       | 03/01/2018              |                        | -0.8  | -0.14 | Aerosol: Guo et al., 2021, Environmental Pollution |   |   |   |   |
| 4  | 27.683   | 85.4                        | 1314                        | BD           | Bode, Kathm   | BD-98       | 09/03/2018              |                        | -1.15 | -0.16 | Aerosol: Guo et al., 2021, Environmental Pollution |   |   |   |   |
| 5  | 27.683   | 85.4                        | 1314                        | BD           | Bode, Kathm   | BD-100      | 25/03/2018              |                        | -1.18 | -0.22 | Aerosol: Guo et al., 2021, Environmental Pollution |   |   |   |   |
| 6  | 27.683   | 85.4                        | 1314                        | BD           | Bode, Kathm   | BD-110      | 24/04/2018              |                        | -1.05 | -0.18 | Aerosol: Guo et al., 2021, Environmental Pollution |   |   |   |   |
| 7  | 27.683   | 85.4                        | 1314                        | BD           | Bode, Kathm   | BD-114      | 24/05/2018              |                        | -1.42 | -0.22 | Aerosol: Guo et al., 2021, Environmental Pollution |   |   |   |   |
| 8  | 27.683   | 85.4                        | 1314                        | BD           | Bode, Kathm   | N128        | 03/01/2018              |                        | 0.24  | -0.18 | Aerosol: Guo et al., 2021, Environmental Pollution |   |   |   |   |
| 9  | 27.683   | 85.4                        | 1314                        | BD           | Bode, Kathm   | N134        | 19/03/2018              |                        | -0.85 | -0.3  | Aerosol: Guo et al., 2021, Environmental Pollution |   |   |   |   |
| 10 | 27.683   | 85.4                        | 1314                        | BD           | Bode, Kathm   | N136        | 25/03/2018              |                        | -0.99 | -0.25 | Aerosol: Guo et al., 2021, Environmental Pollution |   |   |   |   |
| 11 | 27.683   | 85.4                        | 1314                        | BD           | Bode, Kathm   | TSP-148     | 24/04/2018              |                        | -1.18 | -0.26 | Aerosol: Guo et al., 2021, Environmental Pollution |   |   |   |   |
| 12 | 27.683   | 85.4                        | 1314                        | BD           | Bode, Kathm   | TSP-152     | 25/04/2018              |                        | 0.28  | -0.19 | Aerosol: Guo et al., 2021, Environmental Pollution |   |   |   |   |
| 13 | 27.619   | 85.538                      | 1514                        | DHK          | Dhulikhel, Ka | P-110       | 03/01/2018              |                        | -1.1  | -0.2  | Aerosol: Guo et al., 2021, Environmental Pollution |   |   |   |   |
| 14 | 27.619   | 85.538                      | 1514                        | DHK          | Dhulikhel, Ka | P-116       | 19/03/2018              |                        | -0.63 | -0.12 | Aerosol: Guo et al., 2021, Environmental Pollution |   |   |   |   |
| 15 | 27.619   | 85.538                      | 1514                        | DHK          | Dhulikhel, Ka | P-128       | 24/04/2018              |                        | -1.18 | -0.17 | Aerosol: Guo et al., 2021, Environmental Pollution |   |   |   |   |
| 16 | 27.619   | 85.538                      | 1514                        | DHK          | Dhulikhel, Ka | P-138       | 24/05/2018              |                        | -0.49 | -0.15 | Aerosol: Guo et al., 2021, Environmental Pollution |   |   |   |   |
| 17 | 27.483   | 83.283                      | 100                         | LMB          | Lumbini (TSF  | LB-1        | 2013-4-2 and 2013-4-9   |                        | -1.04 | -0.09 | Guo et al., 2023, Geoscience Frontiers             |   |   |   |   |
| 18 | 27.483   | 83.283                      | 100                         | LMB          | Lumbini (TSF  | LB-2        | 2013-4-17 and 2013-4-26 |                        | -0.87 | -0.07 | Guo et al., 2023, Geoscience Frontiers             |   |   |   |   |
| 19 | 27.483   | 83.283                      | 100                         | LMB          | Lumbini (TSF  | LB-2        | 2014-2-2 and 2014-2-9   |                        | -0.8  | -0.27 | Guo et al., 2023, Geoscience Frontiers             |   |   |   |   |

Figure 3: APCC dataset I-8: isotope data.

## References

Magand, O., Angot, H., Bertrand, Y., Sonke, J. E., Laffont, L., Duperray, S., Collignon, L., Boulanger, D., and Dommergue, A.: Over a decade of atmospheric mercury monitoring at Amsterdam Island in the French Southern and Antarctic Lands, *Sci. Data*, 10, 836, <https://doi.org/10.1038/s41597-023-02740-9>, 2023.
